# Supplementary material
Source: PubMed Central journal article supplement (PMC4390269)
Supplement: supp_M114.044875_mcp.M114.044875-1.pdf [file supp_M114.044875_mcp.M114.044875-1.pdf]

Figure S1.

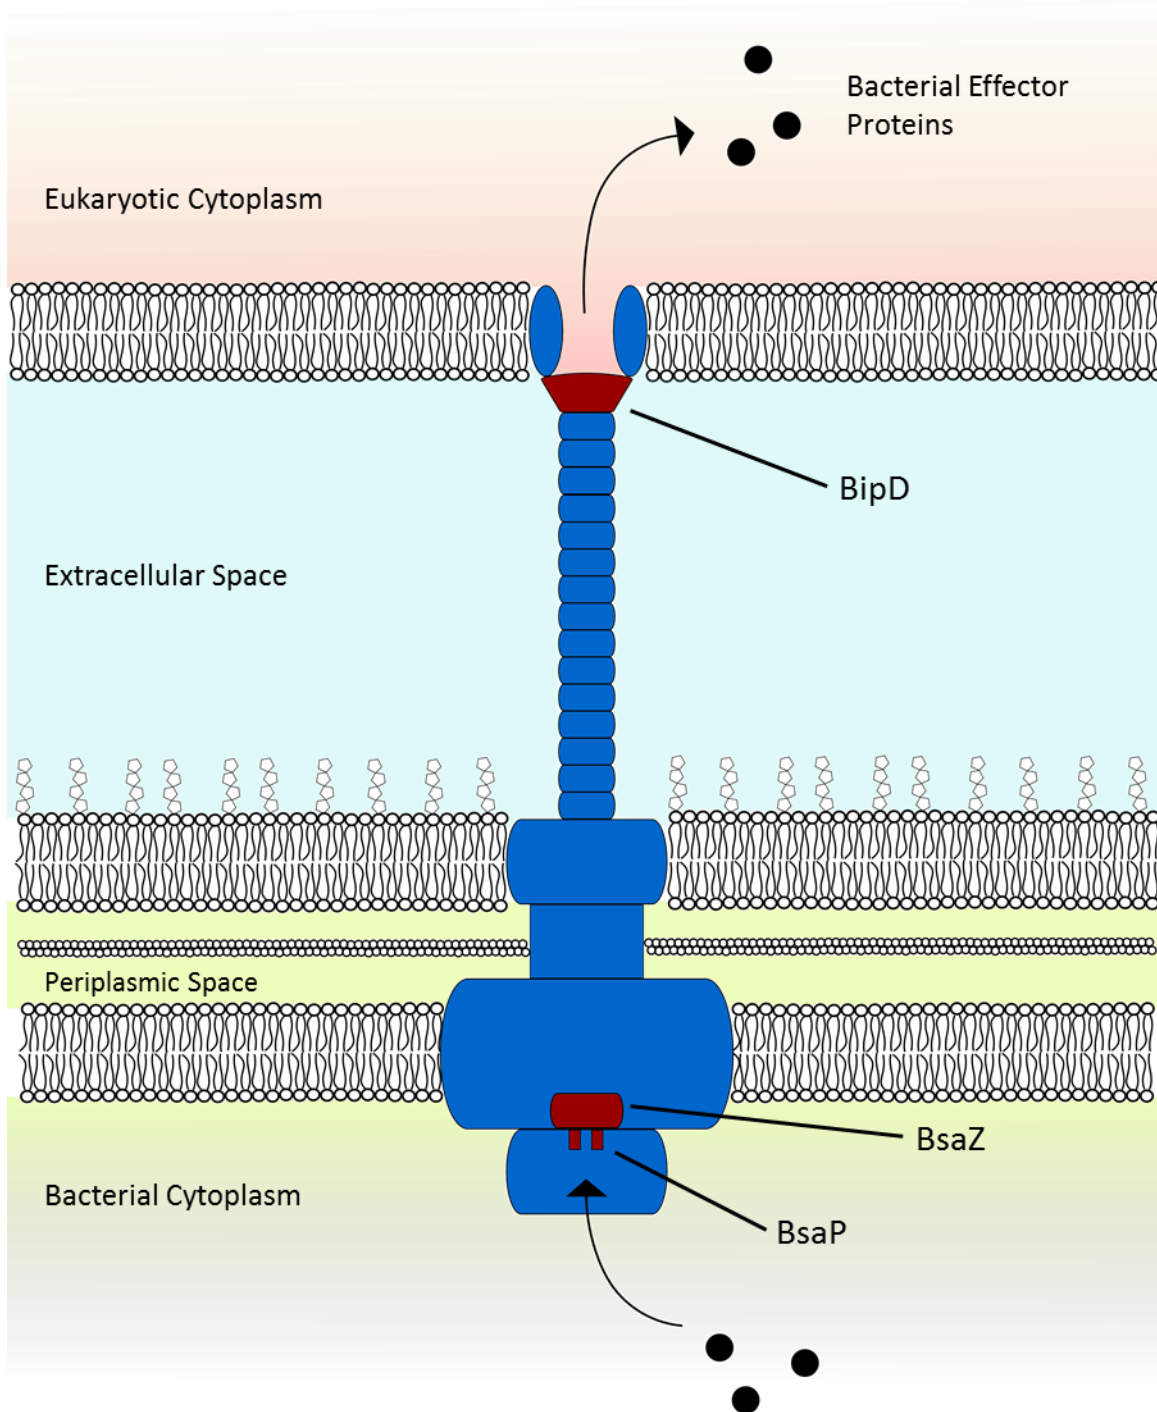

Figure S1. *B. pseudomallei* 10276 Bsa T3SS mutants used in this study.

The *B. pseudomallei* Bsa T3SS facilitates secretion of effector proteins from the bacterial cytoplasm into the cytoplasm of a target eukaryotic cell. *B. pseudomallei* strain 10276 *bsaZ*::pDM4 is an insertion mutant where the gene encoding an integral structural

component of the inner membrane (*bsaZ*) has been disrupted by integration of the pDM4 suicide vector. *B. pseudomallei* strain 10276 *bipD*::pDM4 is also an insertion mutant where the pDM4 suicide vector has integrated into the *bipD* gene, thereby abrogating expression of the needle tip protein. *B. pseudomallei* strain 10276 $\Delta$ *bsaP* is a deletion mutant where the gene encoding BsaP, a predicted 'gatekeeper' family protein which plays a role in T3SS substrate specificity, has been removed.
