# Supplementary material
Source: PubMed Central journal article supplement (PMC4390269)
Supplement: supp_M114.044875_mcp.M114.044875-5.pdf [file supp_M114.044875_mcp.M114.044875-5.pdf]

Figure S5.

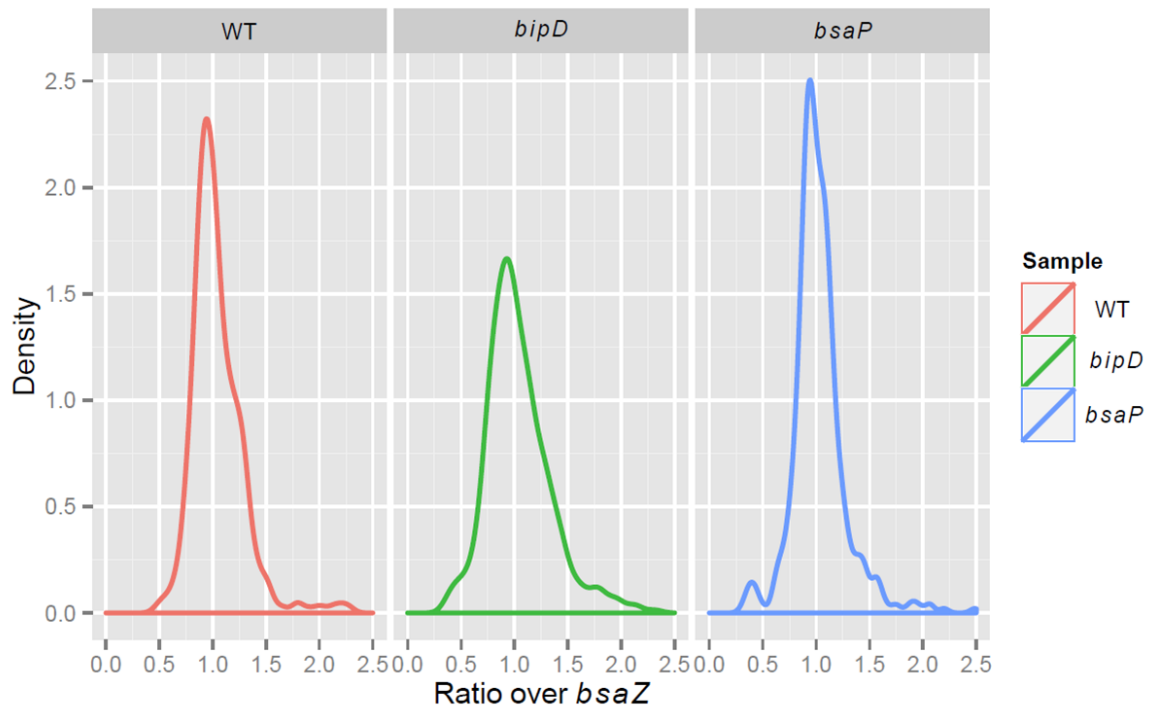

Figure S5. Distribution of iTRAQ ratios ranging between 0 and 2.5.

Density plot constructed with R software ([www.r-project.org](http://www.r-project.org)) illustrating the distribution of the median normalised iTRAQ ratios of proteins with a ratio between 0 and 2.5 in each of the three datasets where protein abundance in either 10276 WT (WT), 10276 *bipD*::pDM4 (*bipD*) or 10276  $\Delta$ *bsaP* (*bsaP*) samples were compared to the 10276 *bsaZ*::pDM4 (*bsaZ*) sample. Ratios close to 1 represent proteins that were present in similar quantities in the supernatants of a given strain when compared to the *bsa*-null mutant.
