# Supplementary material
Source: PubMed Central journal article supplement (PMC4390269)
Supplement: supp_M114.044875_mcp.M114.044875-6.pdf [file supp_M114.044875_mcp.M114.044875-6.pdf]

**Table S1. Strains and plasmids used in this study.**

| <b>Strain or Plasmid</b>              | <b>Characteristics</b>                                                                                                                         | <b>Source</b>     |
|---------------------------------------|------------------------------------------------------------------------------------------------------------------------------------------------|-------------------|
| <b><i>E. coli</i> Strains</b>         |                                                                                                                                                |                   |
| XL1-Blue                              | Amp <sup>s</sup> , Cm <sup>s</sup>                                                                                                             | Agilent           |
| One Shot TOP10 PIR1                   | Pir <sup>+</sup> , Cm <sup>s</sup>                                                                                                             | Life Technologies |
| S17-1 λpir                            | Pir <sup>+</sup> , Cm <sup>s</sup> , Kan <sup>s</sup>                                                                                          | (1)               |
| One Shot TOP10                        | Cm <sup>s</sup>                                                                                                                                | Life Technologies |
| <b><i>B. pseudomallei</i> Strains</b> |                                                                                                                                                |                   |
| 10276 WT                              | Isolated from a clinical infection. Cm <sup>s</sup> , Kan <sup>r*</sup>                                                                        | (2)               |
| 10276 <i>bsaZ</i> ::pDM4              | 10276 with an insertion in <i>bsaZ</i> , Cm <sup>r</sup> , Kan <sup>r*</sup>                                                                   | (1)               |
| 10276 <i>bipD</i> ::pDM4              | 10276 with an insertion in <i>bipD</i> , Cm <sup>r</sup> , Kan <sup>r*</sup>                                                                   | (1)               |
| 10276Δ <i>bsaP</i>                    | 10276 with a 1,098-bp deletion in <i>bsaP</i> , Cm <sup>s</sup> , Kan <sup>r*</sup>                                                            | This study        |
| <b>Plasmids</b>                       |                                                                                                                                                |                   |
| pGEM-T                                | Cloning vector, Amp <sup>r</sup>                                                                                                               | Promega           |
| pGEM-T-Δ <i>bsaP</i>                  | pGEM-T containing a 1,115-bp fragment generated by joining <i>bsaP-del-1/bsaP-del-2</i> and <i>bsaP-del-3/bsaP-del-4</i> with PCR-ligation-PCR | This study        |
| pBHR1                                 | Mobilisable expression vector, Cm <sup>r</sup> , Kan <sup>r</sup>                                                                              | MoBiTec           |
| pBHR1- <i>bsaP</i>                    | pBHR1 containing the full coding region of <i>bsaP</i>                                                                                         | This study        |
| pDM4                                  | Suicide vector, R6Kγ origin, <i>sacBR</i> , Cm <sup>r</sup>                                                                                    | (3)               |
| pDM4-Δ <i>bsaP</i>                    | pDM4 containing a 1,115-bp fragment generated by joining <i>bsaP1/bsaP2</i> and <i>bsaP3/bsaP4</i> with PCR-ligation-PCR                       | This study        |
| pME6032                               | IPTG inducible expression vector, Tet <sup>r</sup>                                                                                             | (4)               |
| pME6032- <i>bopE-myc</i>              | pME6032 containing the full coding region of <i>bopE</i> with an in-frame C-terminal <i>c-myc</i> tag                                          | This study        |
| pME6032-BPSS0860- <i>myc</i>          | pME6032 containing the full coding region of BPSS0860 with an in-frame C-terminal <i>c-myc</i> tag                                             | This study        |
| pME6032- <i>bapA-myc</i>              | pME6032 containing the full coding region of <i>bapA</i> with an in-frame C-terminal <i>c-myc</i> tag                                          | This study        |
| pME6032-BPSS1512- <i>myc</i>          | pME6032 containing the full coding region of BPSS1512 with an in-frame C-terminal <i>c-myc</i> tag                                             | This study        |
| pME6032- <i>bopA-myc</i>              | pME6032 containing the full coding region of <i>bopA</i> with an in-frame C-terminal <i>c-myc</i> tag                                          | This study        |
| pME6032- <i>bprD-myc</i>              | pME6032 containing the full coding region of <i>bprD</i> with an in-frame C-terminal <i>c-myc</i> tag                                          | This study        |
| pME6032-BPSS1916- <i>myc</i>          | pME6032 containing the full coding region of BPSS1916 with an in-frame C-terminal <i>c-myc</i> tag                                             | This study        |

### Table S1. Strains and plasmids used in this study.

Information is given for antibiotic resistances and inserts/deletions that strains or plasmids may contain. The source of the strain/plasmid is also given.

1. Stevens, M. P., Wood, M. W., Taylor, L. A., Monaghan, P., Hawes, P., Jones, P. W., Wallis, T. S., and Galyov, E. E. (2002) An Inv/Mxi-Spa-like type III protein secretion system in *Burkholderia pseudomallei* modulates intracellular behavior of the pathogen. *Mol. Microbiol.* 46, 649–659
2. Maegraith, B. G., and Leithead, C. S. (1964) Melioidosis: a case-report. *Lancet* 283, 862–863
3. Milton, D. L., O'Toole, R., Horstedt, P., and Wolf-Watz, H. (1996) Flagellin A is essential for the virulence of *Vibrio anguillarum*. *J. Bacteriol.* 178, 1310–1319
4. Heeb, S., Blumer, C., and Haas, D. (2002) Regulatory RNA as mediator in GacA/RsmA-dependent global control of exoproduct formation in *Pseudomonas fluorescens* CHAO. *J. Bacteriol.* 184, 1046–1056
