# Supplementary material
Source: PubMed Central journal article supplement (PMC4390269)
Supplement: supp_M114.044875_mcp.M114.044875-7.pdf [file supp_M114.044875_mcp.M114.044875-7.pdf]

**Table S2. Primers used in this study.**

| <b>Primer</b>         | <b>Sequence</b>                                                       | <b>Restriction site</b> | <b>Purpose</b>                       |
|-----------------------|-----------------------------------------------------------------------|-------------------------|--------------------------------------|
| <i>bsaP-del-1</i>     | ATATATACTAGTGACGTTGACAGCAACCAGACGTTTC                                 | <i>SpeI</i>             | Deletion of <i>bsaP</i>              |
| <i>bsaP-del-2</i>     | GCTCATGACTTGTCGTCCATGTAGG                                             | N/A                     | Deletion of <i>bsaP</i>              |
| <i>bsaP-del-3</i>     | TGACGCGCGGCGCCTTTCATTCAATC                                            | N/A                     | Deletion of <i>bsaP</i>              |
| <i>bsaP-del-4</i>     | ATATATAGATCTTTCACGCTCGAGCGCCGAGCGGCGC                                 | <i>BglII</i>            | Deletion of <i>bsaP</i>              |
| <i>bsaP-chk-1</i>     | GATCGTGCTCACGCAGGAGAACGTG                                             | N/A                     | Confirmation of <i>bsaP</i> deletion |
| <i>bsaP-chk-2</i>     | CATCGCCCTTGATGAACTTCATC                                               | N/A                     | Confirmation of <i>bsaP</i> deletion |
| <i>bsaP-exp-F</i>     | ATATATATCGATAGGAGGTTGCCATCATGAGCTCGATCATCGGCGG                        | <i>Clal</i>             | Complementation of <i>bsaP</i>       |
| <i>bsaP-exp-R</i>     | ATATATAAGCTTTCAGTCGGCGCGGGCGCGCCCT                                    | <i>HindIII</i>          | Complementation of <i>bsaP</i>       |
| <i>bapA-F</i>         | ATATATATGCATAGGAGGTTGCCATCATGCCGCCGTCATTACCGAACTTC                    | <i>NsiI</i>             | Expression of c-myc tagged BapA      |
| <i>bapA-myc-R</i>     | ATATAGATCTTTCACAGGTCCTCCTCGGAGATCAGCTTCTGCTCTCGCTTCGTGCCGTTGGCGATCG   | <i>BglII</i>            | Expression of c-myc tagged BapA      |
| <i>bopE-F</i>         | ATATATAGATCTAGGAGGTTGCCATCATGTCTGCTTCATAGAATGAAATCGGT                 | <i>BglII</i>            | Expression of c-myc tagged BopE      |
| <i>bopE-myc-R</i>     | ATATCTCGAGTCACAGGTCCTCCTCGGAGATCAGCTTCTGCTCAGCCGGAGAACCCCGAGA         | <i>XhoI</i>             | Expression of c-myc tagged BopE      |
| <i>bprD-F</i>         | ATATATCCATGGAGGAGGTTGCCATCATGAAGCTCAATGGAATGACCGCCGC                  | <i>NcoI</i>             | Expression of c-myc tagged BprD      |
| <i>bprD-myc-R</i>     | ATATAGATCTTTCACAGGTCCTCCTCGGAGATCAGCTTCTGCTCCGGCGCCGGGCGCTGCGCCCGCGTA | <i>BglII</i>            | Expression of c-myc tagged BprD      |
| <i>BPSS0860-F</i>     | ATATATATCGATAGGAGGTTGCCATCATGGCGATCACCCAGACGGGGACCACCTCGAAAG          | <i>Clal</i>             | Expression of c-myc tagged BPSS0860  |
| <i>BPSS0860-myc-R</i> | ATATCTCGAGTCACAGGTCCTCCTCGGAGATCAGCTTCTGCTCCTTGTGTTTCGCGAGCGCGCCCGAGC | <i>XhoI</i>             | Expression of c-myc tagged BPSS0860  |
| <i>bopA-F</i>         | ATATATCCATGGAGGAGGTTGCCATCATGATCAATGTCGATGCATTCGT                     | <i>NcoI</i>             | Expression of c-myc tagged BopA      |
| <i>bopA-myc-R</i>     | ATATAGATCTTTCACAGGTCCTCCTCGGAGATCAGCTTCTGCTCGGCGGATCGCAGCCGCCATGA     | <i>BglII</i>            | Expression of c-myc tagged BopA      |
| <i>BPSS1916-F</i>     | ATATATCCATGGAGGAGGTTGCCATCATGCAAGCAAAACGCGTGGCATT                     | <i>NcoI</i>             | Expression of c-myc tagged BPSS1916  |
| <i>BPSS1916-myc-R</i> | ATATAGATCTTTCACAGGTCCTCCTCGGAGATCAGCTTCTGCTCGGACATGTGCATCCCGCCGTTGA   | <i>BglII</i>            | Expression of c-myc tagged BPSS1916  |
| <i>BPSS1512-F</i>     | ATATATCCATGGAGGAGGTTGCCATCATGAAGCTCGACGTCCGGCGTTTCG                   | <i>NcoI</i>             | Expression of c-myc tagged           |

|                       |                                                                                       |              |                                                   |
|-----------------------|---------------------------------------------------------------------------------------|--------------|---------------------------------------------------|
|                       |                                                                                       |              | BPSS1512                                          |
| <i>BPSS1512-myc-R</i> | ATAT <u>CTCGAGT</u> CACAGGTCCTCCTCGGAGATCA<br>GCTTCTGCTCTCGATAGATCGCGATTTGATCG<br>ACA | <i>Xho</i> I | Expression of c-<br><i>myc</i> tagged<br>BPSS1512 |

**Table S2. Primers used in this study.**

Restriction sites are underlined and the enzymes they correspond to are listed as well as a short description of the intended use of the primers.
